# Supplementary material
Source: PubMed Central journal article supplement (PMC8819843)
Supplement: PRO-31-443-s001.pdf [file PRO-31-443-s001.pdf]

# Two different kinds of interaction modes of deaminase APOBEC3A with single-stranded DNA in solution detected by nuclear magnetic resonance

Yaping Liu<sup>a,b§</sup>, Wenxian Lan<sup>a§</sup>, Chunxi Wang<sup>a</sup>, Chunyang Cao<sup>a,b\*</sup>

<sup>a</sup> State Key Laboratory of Bioorganic and Natural Product Chemistry, Center for Excellence in Molecular Synthesis, Shanghai Institute of Organic Chemistry, Chinese Academy of Sciences, 345 Lingling Road, Shanghai, 200032, China.

<sup>b</sup> University of Chinese Academy of Science, No. 19A, Yuquan Road, Shijingshan District, Beijing, 100049, China.

## Supplemental figures and tables

Figure S1

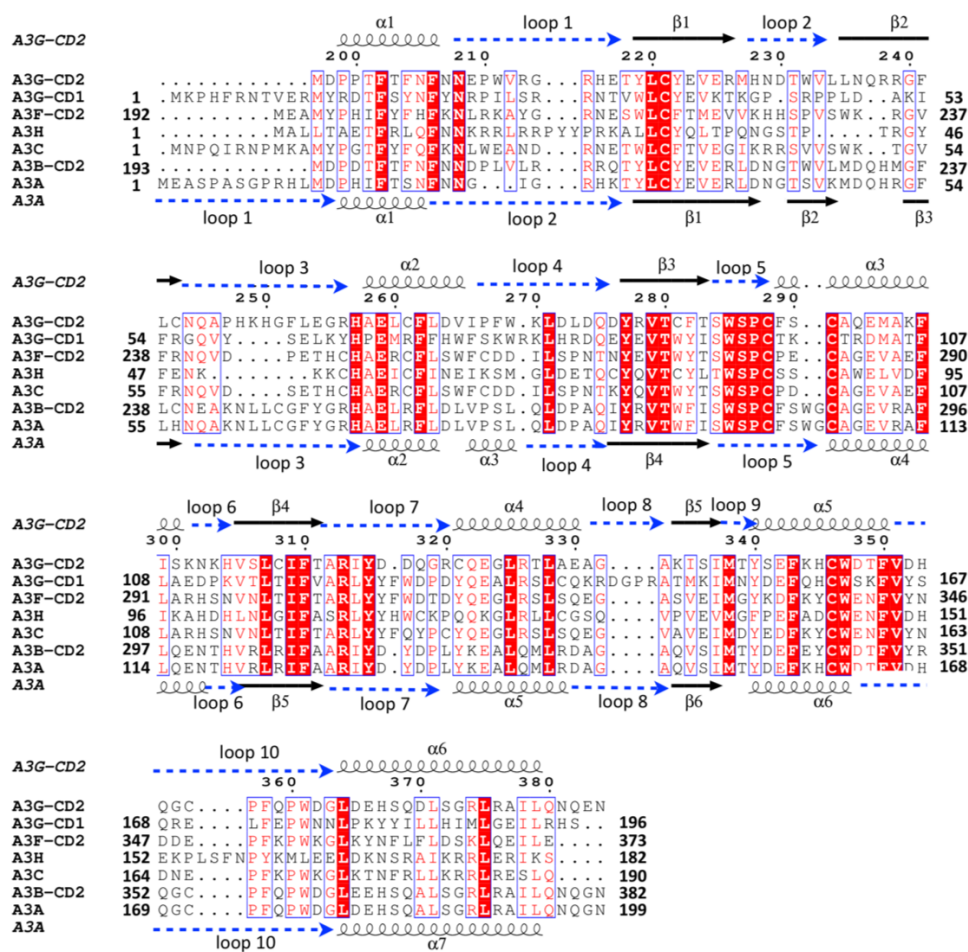

Figure S1 Sequence alignment of A3 members indicates the conserved sites for specific identification of target motifs TC and CC<sup>1,2</sup>.

**Figure S2**

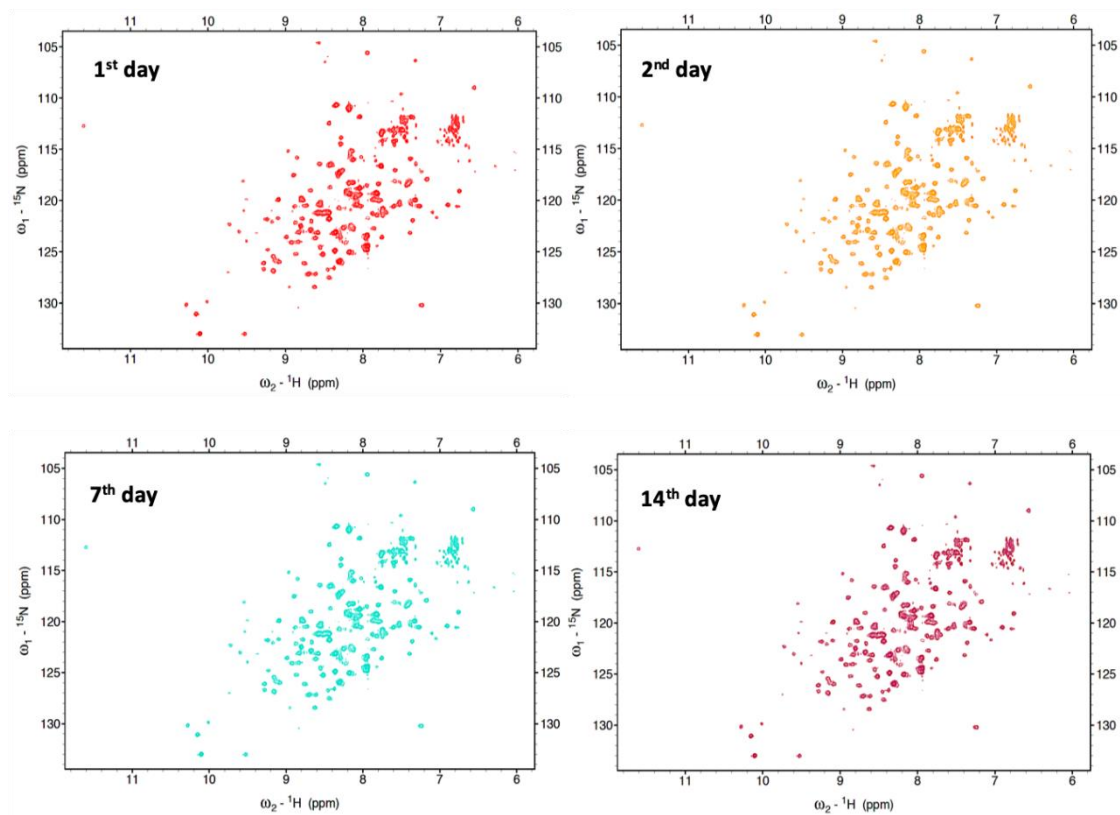

**Figure S2** A3A<sub>4m</sub> is stable for NMR studies within 14 days tested by running <sup>1</sup>H-<sup>15</sup>N HSQC spectra, in which there was only one set of <sup>1</sup>H-<sup>15</sup>N cross-peaks.

Figure S3

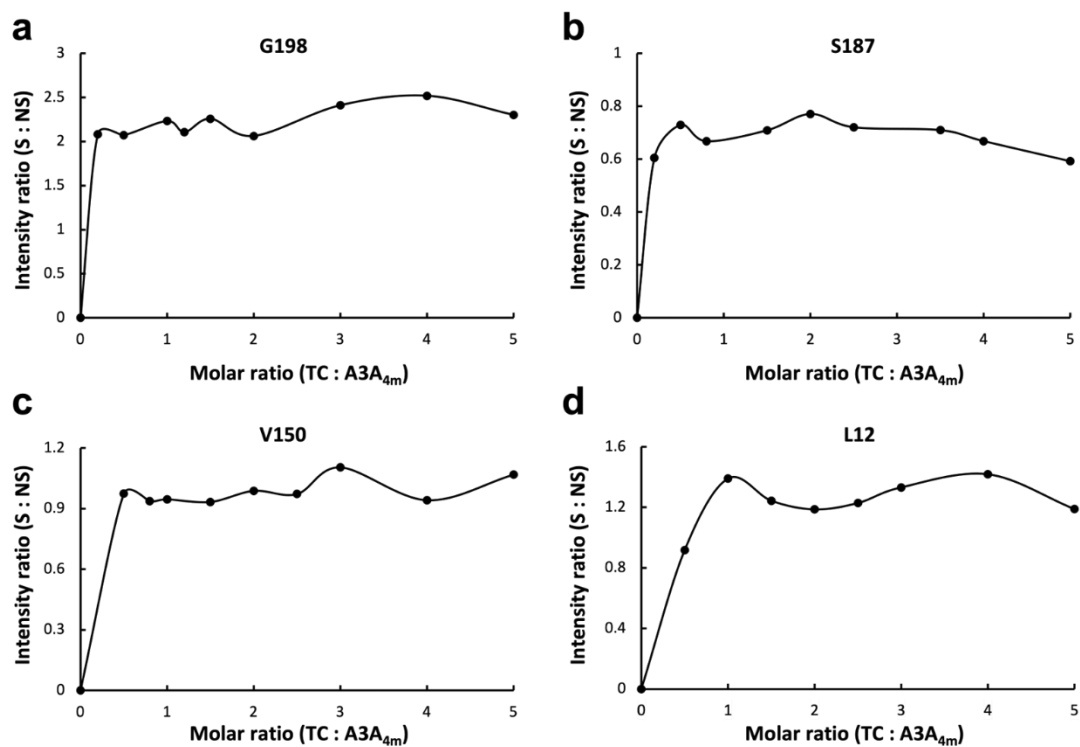

**Figure S3** The ratios of specific complex (*i.e.* S in vertical axis) vs non-specific complex (*i.e.* NS in the abscissa axis) in solution, measured by intensity ratios of the cross-peaks belonging to residues (a) G198, (b) S187, (c) V150 and (d) L12 in HSQC spectra acquired at different molar ratios of TC DNA vs A3A<sub>4M</sub>.

Figure S4

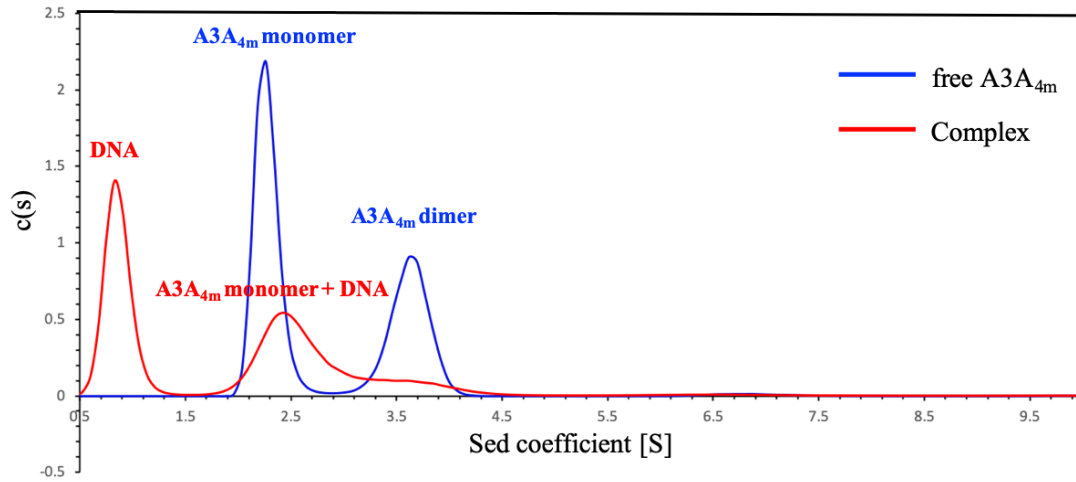

**Figure S4** The aggregation states of free A3A<sub>4M</sub> (in blue) and its complex with TC DNA (in red) determined by ultracentrifugation assay. Based on the fact that the theoretical molecular weights of A3A<sub>4M</sub> and of free TC DNA are 23.02KDa and 2.99KDa, respectively, we deduced that free A3A<sub>4M</sub> was a mixture composed by monomer and dimer in solution, but its complex with TC DNA was mainly made of A3A monomer plus TC DNA. In this figure, the complex sample of A3A with DNA was prepared at a molar ratio equal to 2 (TC DNA vs A3A).

Figure S5

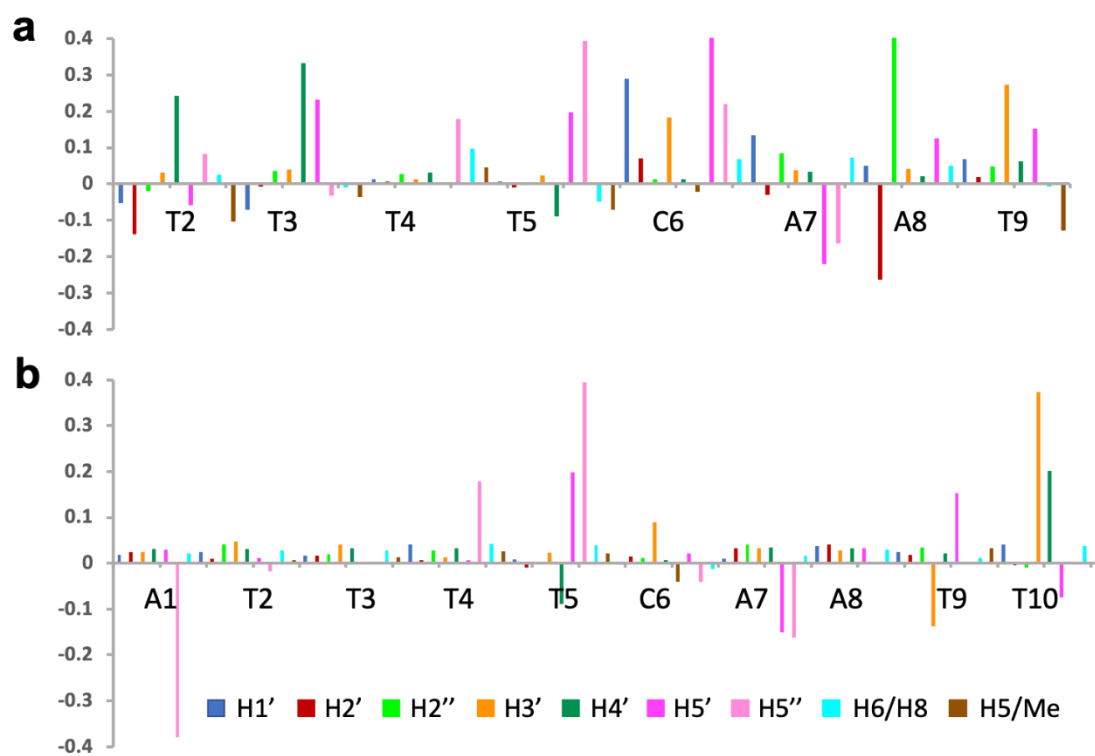

**Figure S5** Chemical shift changes of the protons in two kinds of TC DNA conformers upon its interaction with A3A4M. (a) DNA<sup>S</sup> and (b) DNA<sup>NS</sup>.

Figure S6

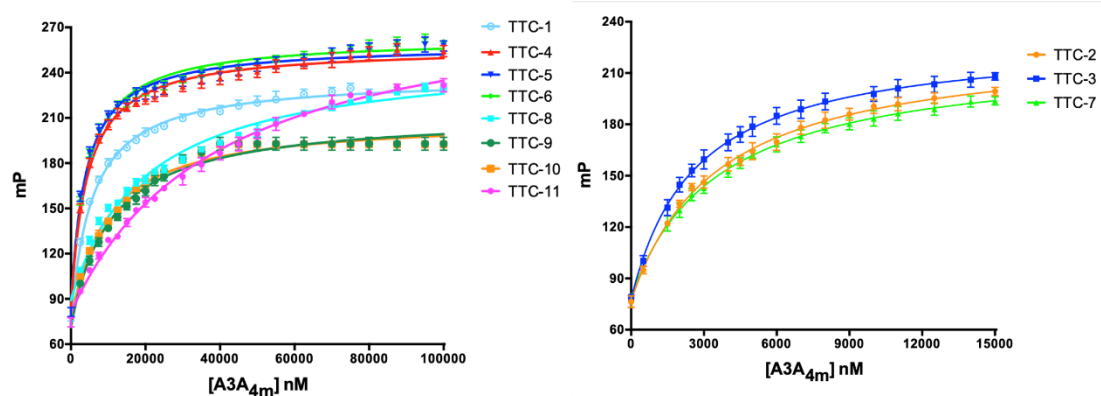

**Figure S6** The effects on A3A<sub>4M</sub> binding affinities by adding bases into 3'- end (*i.e.*, TTC-4 DNA, TTC-5 DNA and TTC-6 DNA) or 5'- end (*i.e.*, TTC-8 DNA, TTC-9 DNA, TTC-10 DNA and TTC-11 DNA), compared to TTC-2. The binding affinities were measured by fluorescent polarization (FP) assay were listed in Table S1.

**Figure S7**

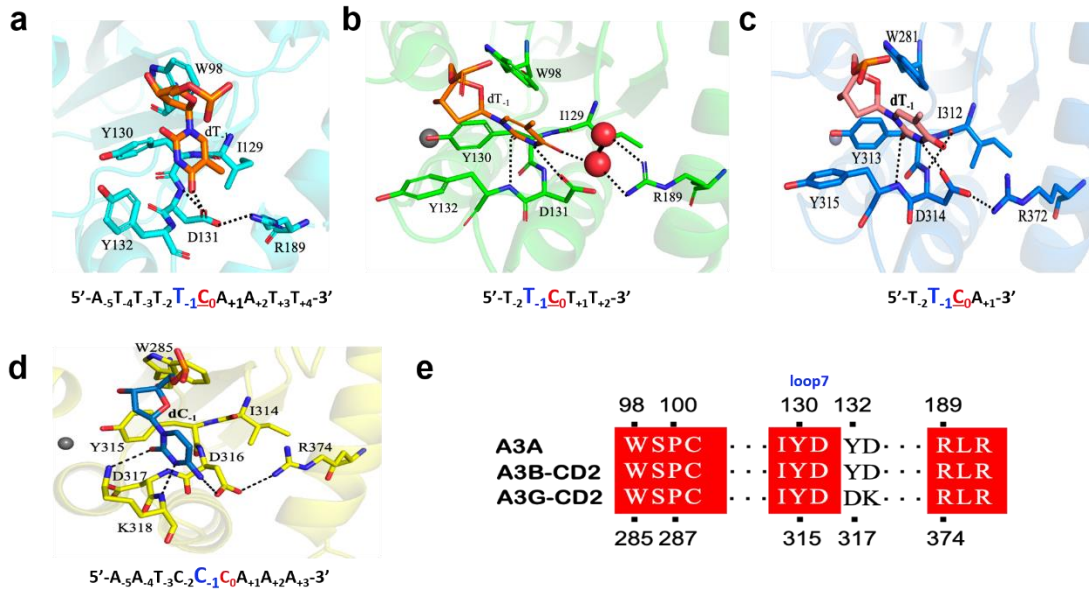

**Figure S7** The base dT<sub>-1</sub> or dC<sub>-1</sub> in DNA was specifically identified by the conserved residues in A3 members (shown in figure S1) in different A3-DNA structures. (a) A3A<sup>S</sup>-DNA<sup>S</sup> complex, (b) A3A-DNA complex (PDB: 5KEG); (c) A3Bctd\*-DNA complex (PDB: 5TD5), (d) A3G-CTD2\* complex (PDB: 6BUX); In (a-d), DNA sequences were listed in each structure. (e) The conserved residues among A3A, A3B and A3G interact with dT<sub>-1</sub> or dC<sub>-1</sub>. The dashed lines represent hydrogen-bonds.

Figure S8

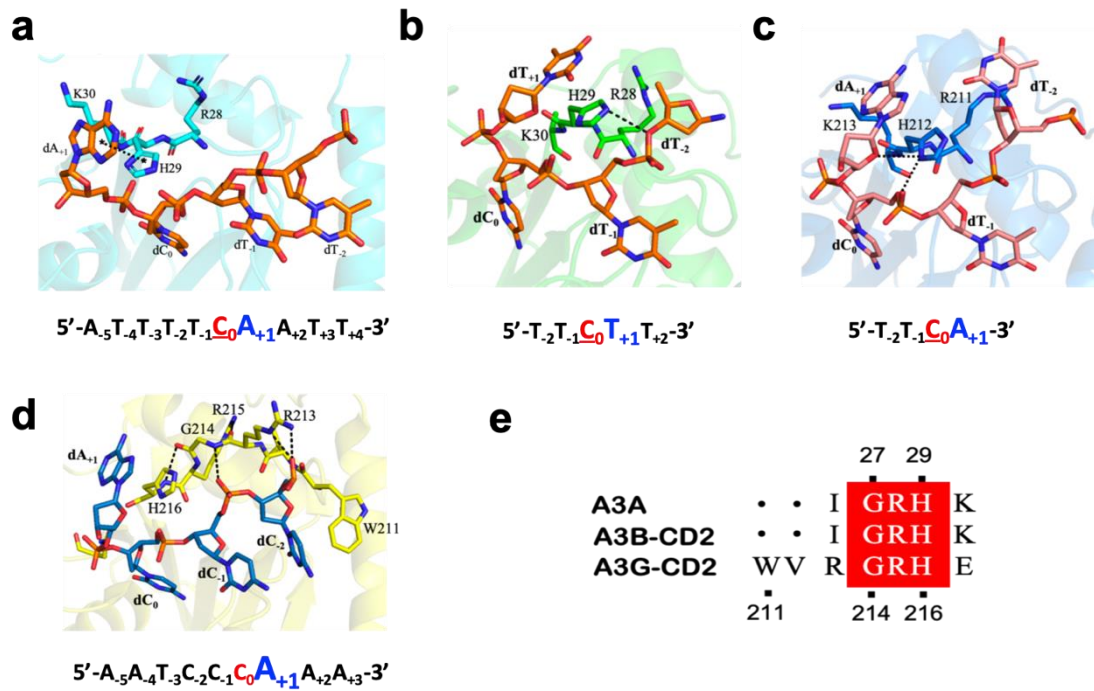

**Figure S8** The base dA<sub>+1</sub> in DNA was specifically identified by the conserved residues in loop 1 of A3 members in different A3-DNA structures. (a) A3A<sup>S</sup>-DNA<sup>S</sup> complex, (b) A3A-DNA complex (PDB: 5KEG); (c) A3Bctd\*-DNA complex (PDB: 5TD5), (d) A3G-CTD2\* complex (PDB: 6BUX); In (a-d), DNA sequences were listed in each structure. (e) The conserved residues in loop 1 among A3A, A3B and A3G interact with dA<sub>+1</sub>. The dashed lines with stars stands for stacking interactions, while dashed lines without stars represent hydrogen-bonds.



**Figure S9**

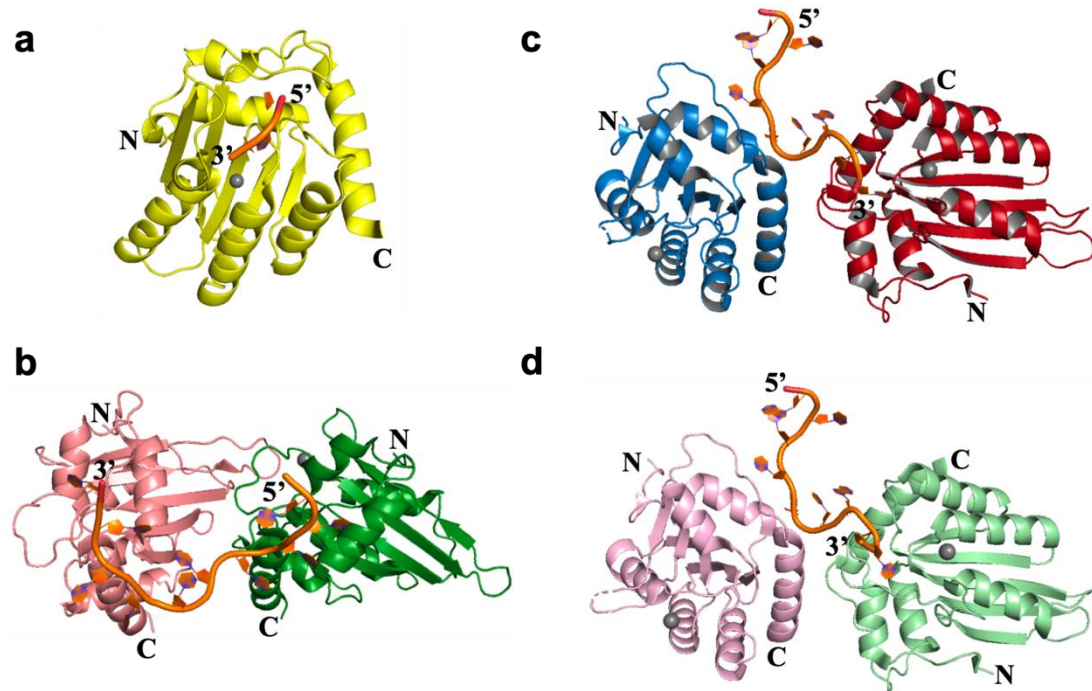

**Figure S9** DNA non-specific binding is involved in its interactions with different A3 members. (a) rA3G-CD1 with poly dT ssDNA (PDB: 5K83); (b) hA3F-CD2 dimer with one poly dT ssDNA (PDB: 5W2M); (c and d) hA3Fc-CD2 dimer with one DNA strand containing two TC motifs with PDB codes of 5ZVB and 5ZVA, respectively. The N- and C-termini of A3 proteins, and the 3'- and 5'- ends of DNA were labeled. DNA and A3 proteins were shown in cartoon modes.

**Table S1** Intermolecular NOEs used in structural determination of A3A<sup>NS</sup>-DNA<sup>NS</sup>.

| Atom 1 (in DNA <sup>NS</sup> ) | Atom 2 (in A3A <sup>NS</sup> )                                                                            |
|--------------------------------|-----------------------------------------------------------------------------------------------------------|
| A1-H1'                         | Q 184-H $\gamma$ 1<br>Q 184-H $\gamma$ 2<br>A185- $\beta$ -CH <sub>3</sub>                                |
| A1-H3'<br>A1-H4'               | A185- $\beta$ -CH <sub>3</sub><br>A185-H $\alpha$<br>A185- $\beta$ -CH <sub>3</sub>                       |
| A1-H5''                        | A185-H $\alpha$                                                                                           |
| A1-H8                          | E181-H $\alpha$<br>E181-H $\beta$ 1<br>E181-H $\beta$ 2<br>Q184-H $\gamma$ 1<br>Q184-H $\gamma$ 2         |
| T2-H4'<br>T2-H5'<br>T2-H5''    | A185- $\beta$ -CH <sub>3</sub><br>A185-H $\alpha$<br>A185-H $\alpha$<br>A185- $\beta$ -CH <sub>3</sub>    |
| T2-H6                          | G25-H $\alpha$ 1<br>G25-H $\alpha$ 2<br>L186- $\delta$ 2-CH <sub>3</sub>                                  |
| T2-5-CH <sub>3</sub>           | E181-H $\alpha$<br>E181-H $\beta$ 1<br>E181-H $\beta$ 2<br>H182-H $\alpha$                                |
| T3-H1'<br>T3-H6                | N24-H $\alpha$<br>I26- $\delta$ 1-CH <sub>3</sub><br>I26- $\gamma$ 2-CH <sub>3</sub>                      |
| T3-5-CH <sub>3</sub>           | G25-H $\alpha$ 1<br>G25-H $\alpha$ 2<br>I26- $\delta$ 1-CH <sub>3</sub><br>A185- $\beta$ -CH <sub>3</sub> |
| T4-H4'                         | G27-H $\alpha$ 1<br>G27-H $\alpha$ 2                                                                      |
| T4-H5''                        | I26- $\delta$ 1-CH <sub>3</sub>                                                                           |
| T4-H6                          | A185-H $\alpha$                                                                                           |
| T4-5-CH <sub>3</sub>           | I26- $\delta$ 1-CH <sub>3</sub><br>K30-H $\beta$ 1<br>K30-H $\beta$ 2                                     |
| T5-H6                          | G25-H $\alpha$ 1<br>G25-H $\alpha$ 2                                                                      |

|                      |                                                                                                                      |
|----------------------|----------------------------------------------------------------------------------------------------------------------|
|                      | I26- H $\alpha$<br>I26- H $\beta$<br>I26- $\gamma$ -CH <sub>3</sub>                                                  |
| T5-5-CH <sub>3</sub> | G25-H $\alpha$ 1<br>G25-H $\alpha$ 2<br>I26- H $\alpha$                                                              |
| C6-H6                | I26- HN<br>G27-H $\alpha$ 1<br>G27-H $\alpha$ 2                                                                      |
| C6-H5                | I26- $\gamma$ -CH <sub>3</sub><br>K30- H $\alpha$                                                                    |
| A7-H1'               | Q58-H $\alpha$                                                                                                       |
| A7-H3'               | K30- H $\beta$ 1<br>K30- H $\beta$ 2                                                                                 |
| A7-H4'               | Q58-H $\alpha$<br>Q58-H $\gamma$ 1<br>Q58-H $\gamma$ 2                                                               |
| A7-H8                | N57- H $\beta$ 1<br>N57- H $\beta$ 2                                                                                 |
| A8-H1'               | N57- H $\beta$ 1<br>N57- H $\beta$ 2<br>Q58- H $\beta$ 1<br>Q58- H $\beta$ 2<br>F66- H $\beta$ 1<br>F66- H $\beta$ 2 |
| A8-H8                | A59- $\beta$ -CH <sub>3</sub>                                                                                        |
| T9-H6                | L62-H $\beta$ 1<br>L62-H $\beta$ 1<br>L62- $\delta$ 1-CH <sub>3</sub>                                                |
| T9-5-CH <sub>3</sub> | A59- H $\alpha$                                                                                                      |
| T10-H1'              | N63- H $\alpha$                                                                                                      |

**Table S2** Intermolecular NOEs used in structural determination of A3A<sup>S</sup>-DNA<sup>S</sup>.

| Atom 1 (in DNA <sup>S</sup> ) | Atom 2 (in A3A <sup>S</sup> )                                                                        |
|-------------------------------|------------------------------------------------------------------------------------------------------|
| T2-5-CH <sub>3</sub>          | H182- Hβ1<br>H182-Hβ2                                                                                |
| T3-H1'                        | I26- δ1-CH <sub>3</sub>                                                                              |
| T3-H2'                        | I26- δ1-CH <sub>3</sub>                                                                              |
| T3-H6                         | I26- γ2-CH <sub>3</sub>                                                                              |
| T3- 5-CH <sub>3</sub>         | I26- γ2-CH <sub>3</sub><br>A185-β-CH <sub>3</sub><br>L186- δ2-CH <sub>3</sub>                        |
| T4-H1'                        | I26- γ2-CH <sub>3</sub>                                                                              |
| T4-H6                         | I26- γ2-CH <sub>3</sub>                                                                              |
| T4- 5-CH <sub>3</sub>         | I26- Hβ<br>I26- δ1-CH <sub>3</sub><br>I26- γ2-CH <sub>3</sub>                                        |
| T5-H6                         | I26- Hβ<br>I26- γ2-CH <sub>3</sub><br>W98-Hβ1<br>W98-Hβ2<br>D131- Hα                                 |
| T5- 5-CH <sub>3</sub>         | I26- Hβ<br>G27-Hα1<br>G27-Hα2<br>W98-Hα<br>Y132-Hβ1<br>Y132-Hβ2                                      |
| C6-H1'                        | H70-Hβ1<br>H70-Hβ2<br>W98-Hα                                                                         |
| C6-H2'                        | N57- Hβ1<br>N57- Hβ2                                                                                 |
| C6-H2''                       | T31-Hα<br>N57- Hβ1<br>N57- Hβ2<br>H70-Hβ1<br>H70-Hβ2<br>P100-Hβ1<br>P100-Hβ2<br>P100-Hγ1<br>P100-Hγ2 |
| C6-H3'                        | H70-Hδ2                                                                                              |
| C6-H4'                        | H29-Hβ1<br>H29-Hβ2                                                                                   |

|         |                                                                                                                                                                                                                                       |
|---------|---------------------------------------------------------------------------------------------------------------------------------------------------------------------------------------------------------------------------------------|
|         | H70-H $\delta$ 2                                                                                                                                                                                                                      |
| C6-H5'  | N57- H $\beta$ 1<br>N57- H $\beta$ 2                                                                                                                                                                                                  |
| C6-H5'' | H29-H $\beta$ 1<br>H29-H $\beta$ 2                                                                                                                                                                                                    |
| C6-H6   | K30-H $\alpha$<br>S97-H $\beta$ 1<br>S97-H $\beta$ 2<br>W98-H $\alpha$<br>W98-H $\beta$ 1<br>W98-H $\beta$ 2<br>P100-H $\alpha$<br>P100-H $\gamma$ 1<br>P100-H $\gamma$ 2<br>C101-H $\beta$ 1<br>C101-H $\beta$ 2<br>Y130- H $\alpha$ |
| C6-H5   | H70-H $\delta$ 2<br>H70-H $\epsilon$ 1<br>W98-H $\alpha$<br>W98-H $\delta$ 1<br>P100-H $\alpha$<br>Y130- H $\alpha$<br>Y130- H $\delta$ 1<br>Y130- H $\delta$ 2<br>Y132-H $\beta$ 1<br>Y132-H $\beta$ 2                               |
| A7-H1'  | K30-H $\alpha$<br>R69-H $\beta$ 1<br>R69-H $\beta$ 2                                                                                                                                                                                  |
| A7-H2'  | K30-H $\alpha$<br>K30-H $\beta$ 1<br>K30-H $\beta$ 2<br>H70-H $\delta$ 2                                                                                                                                                              |
| A7-H2'' | K30-H $\alpha$<br>K60-H $\epsilon$ 1<br>K60-H $\epsilon$ 2                                                                                                                                                                            |
| A7-H3'  | K30-H $\alpha$<br>K30-H $\beta$ 1<br>K30-H $\beta$ 2<br>K60-H $\beta$ 1<br>K60-H $\beta$ 2<br>K60-H $\delta$ 1                                                                                                                        |

|                        |                                                                                                                                                                                                                                  |
|------------------------|----------------------------------------------------------------------------------------------------------------------------------------------------------------------------------------------------------------------------------|
|                        | K60-H $\delta$ 2<br>K60-H $\epsilon$ 1<br>K60-H $\epsilon$ 2                                                                                                                                                                     |
| A7-H5'                 | K30-H $\beta$ 1<br>K30-H $\beta$ 2                                                                                                                                                                                               |
| A7-H8                  | K30-H $\alpha$<br>A59-H $\alpha$<br>A59- $\beta$ -CH <sub>3</sub><br>K60-H $\alpha$                                                                                                                                              |
| A8-H1'                 | R69- H $\alpha$                                                                                                                                                                                                                  |
| A8-H2'                 | K60-H $\epsilon$ 1<br>K60-H $\epsilon$ 2                                                                                                                                                                                         |
| A8-H2''                | K60-H $\alpha$<br>K60-H $\epsilon$ 1<br>K60-H $\epsilon$ 2                                                                                                                                                                       |
| A8-H3'                 | Q58-H $\beta$ 1<br>Q58-H $\beta$ 2<br>K60-H $\alpha$<br>L62- $\delta$ 1-CH <sub>3</sub>                                                                                                                                          |
| A8-H8                  | K60-H $\alpha$<br>K60-H $\delta$ 1<br>K60-H $\delta$ 2<br>K60-H $\epsilon$ 1<br>K60-H $\epsilon$ 2                                                                                                                               |
| T9-H3'                 | L62- $\delta$ 1-CH <sub>3</sub>                                                                                                                                                                                                  |
| T9- 5-CH <sub>3</sub>  | K60-H $\alpha$<br>K60-H $\delta$ 1<br>K60-H $\delta$ 2<br>K60-H $\epsilon$ 1<br>K60-H $\epsilon$ 2<br>L62-H $\alpha$<br>L62-H $\beta$ 1<br>L62-H $\beta$ 2<br>L62- $\delta$ 1-CH <sub>3</sub><br>L62- $\delta$ 2-CH <sub>3</sub> |
| T10-H6                 | L62- $\delta$ 2-CH <sub>3</sub>                                                                                                                                                                                                  |
| T10- 5-CH <sub>3</sub> | L62-H $\beta$ 1<br>L62-H $\beta$ 2<br>L62- $\delta$ 1-CH <sub>3</sub><br>L62- $\delta$ 2-CH <sub>3</sub>                                                                                                                         |

**Table S3** Experimental restraints and structural statistics for A3A<sub>4M</sub> in complexes with different ssDNA.

|                                                               | A3A <sup>NS</sup> -DNA <sup>NS</sup> | A3A <sup>S</sup> -DNA <sup>S</sup> |
|---------------------------------------------------------------|--------------------------------------|------------------------------------|
| <b>Number of restraints</b>                                   |                                      |                                    |
| <b><i>Distance restraints from NOEs</i></b>                   |                                      |                                    |
| Total NOE                                                     | 3346                                 | 3409                               |
| Intra-residue( <i>i-j</i> =0)                                 | 1613                                 | 1606                               |
| Sequential( <i> i-j</i> =1)                                   | 654                                  | 678                                |
| Medium range( <i>(1&lt; i-j ≤5)</i> )                         | 375                                  | 369                                |
| Long range( <i> i-j &gt;5</i> )                               | 654                                  | 661                                |
| Intermolecular (protein-DNA)                                  | 50                                   | 95                                 |
| Inter-monomers                                                |                                      |                                    |
| Hydrogen bonds                                                | 170                                  | 174                                |
| Total dihedral angle restraints                               | 369                                  | 369                                |
| Φ                                                             | 184                                  | 184                                |
| Ψ                                                             | 185                                  | 185                                |
| <b>Structural statistics</b>                                  |                                      |                                    |
| <b><i>r.m.s.d versus the mean structure(Å)</i></b>            |                                      |                                    |
| All backbone atoms                                            | 1.57 ± 0.23 Å                        | 1.46 ± 0.46 Å                      |
| All heavy atoms                                               | 1.91 ± 0.19 Å                        | 1.79 ± 0.38 Å                      |
| Backbone atoms (2 <sup>nd</sup> structure)                    | 0.55 ± 0.11 Å                        | 0.54 ± 0.07 Å                      |
| Heavy atoms (2 <sup>nd</sup> structure)                       | 1.13 ± 0.09 Å                        | 1.16 ± 0.13 Å                      |
| <b><i>Rms Deviations from the experimental restraints</i></b> |                                      |                                    |
| NOE distance(Å)                                               | 0.035 ± 0.005                        | 0.032 ± 0.001                      |
| Dihedral angels (deg)                                         | 1.37 ± 0.098                         | 0.96 ± 0.11                        |
| <b><i>Rms Deviations from idealized geometry</i></b>          |                                      |                                    |
| Bonds(Å)                                                      | 0.0025 ± 0.00017                     | 0.0027 ± 0.00010                   |
| Angels(deg.)                                                  | 0.38 ± 0.013                         | 0.42 ± 0.029                       |
| Impropers(deg.)                                               | 0.31 ± 0.018                         | 0.32 ± 0.013                       |
| <b><i>Ramachandran Analysis</i></b>                           |                                      |                                    |
| residues in most favored regions                              | 89.0%                                | 86.6%                              |
| residues in additionally allowed regions                      | 9.8%                                 | 11.7%                              |
| residues in generously allowed regions                        | 1.2%                                 | 1.7%                               |
| residues in disallowed regions                                | 0.0%                                 | 0%                                 |

### Supplemental References

1. Kouno, T.; Silvas, T. V.; Hilbert, B. J.; Shandilya, S. M. D.; Bohn, M. F.; Kelch, B. A.; Royer, W. E.; Somasundaran, M.; Kurt Yilmaz, N.; Matsuo, H.; Schiffer, C. A., Crystal structure of APOBEC3A bound to single-stranded DNA reveals structural basis for cytidine deamination and specificity. *Nature communications* **2017**, *8*, 15024.
2. Shi, K.; Carpenter, M. A.; Banerjee, S.; Shaban, N. M.; Kurahashi, K.; Salamango, D. J.; McCann, J. L.; Starrett, G. J.; Duffy, J. V.; Demir, O.; Amaro, R. E.; Harki, D. A.; Harris, R. S.; Aihara, H., Structural basis for targeted DNA cytosine deamination and mutagenesis by APOBEC3A and APOBEC3B. *Nature structural & molecular biology* **2017**, *24* (2), 131-139.
